# Supplementary material
Source: PubMed Central journal article supplement (PMC8344042)
Supplement: NIHMS1699380-supplement-Supplementary_figures.pdf [file NIHMS1699380-supplement-Supplementary_figures.pdf]

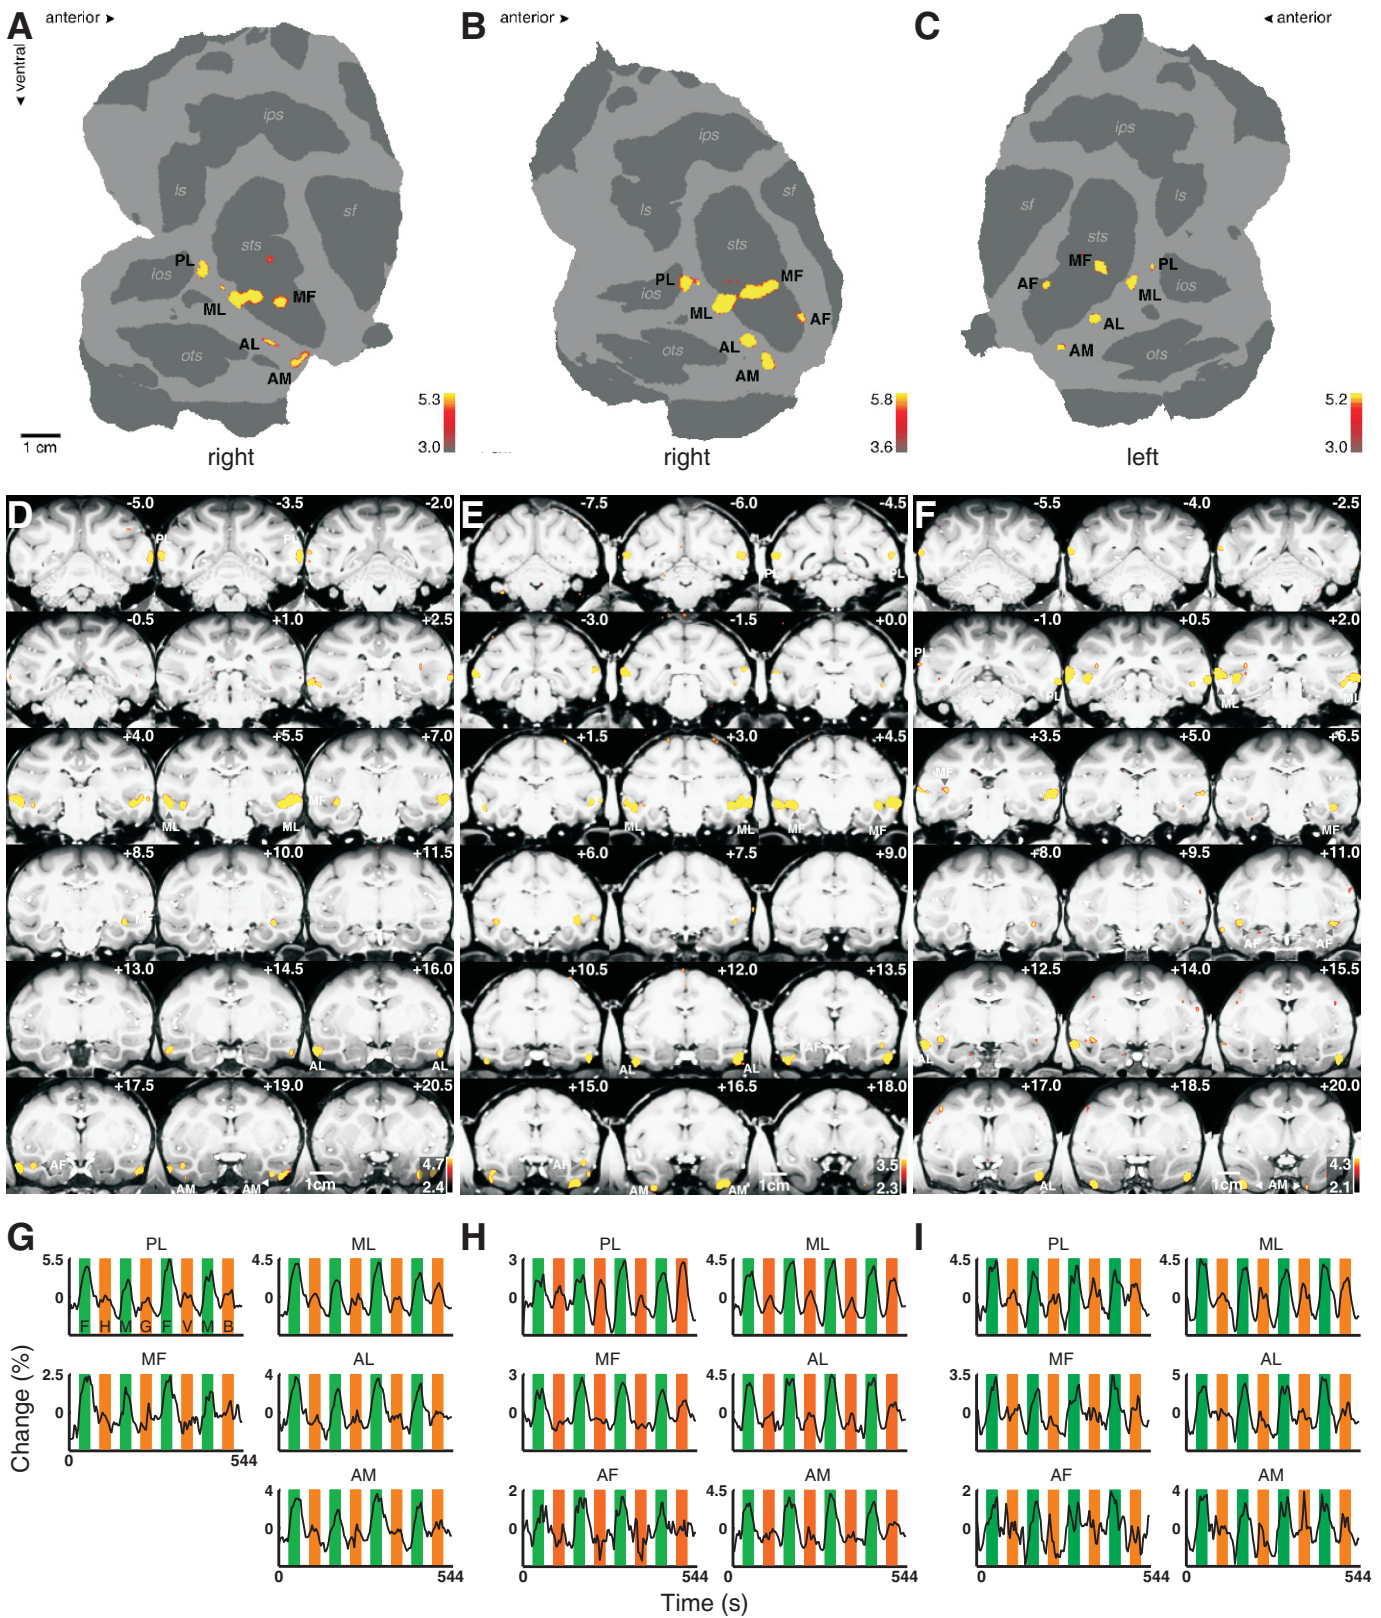

Figure S1: the face patches (M2, M3, M4)

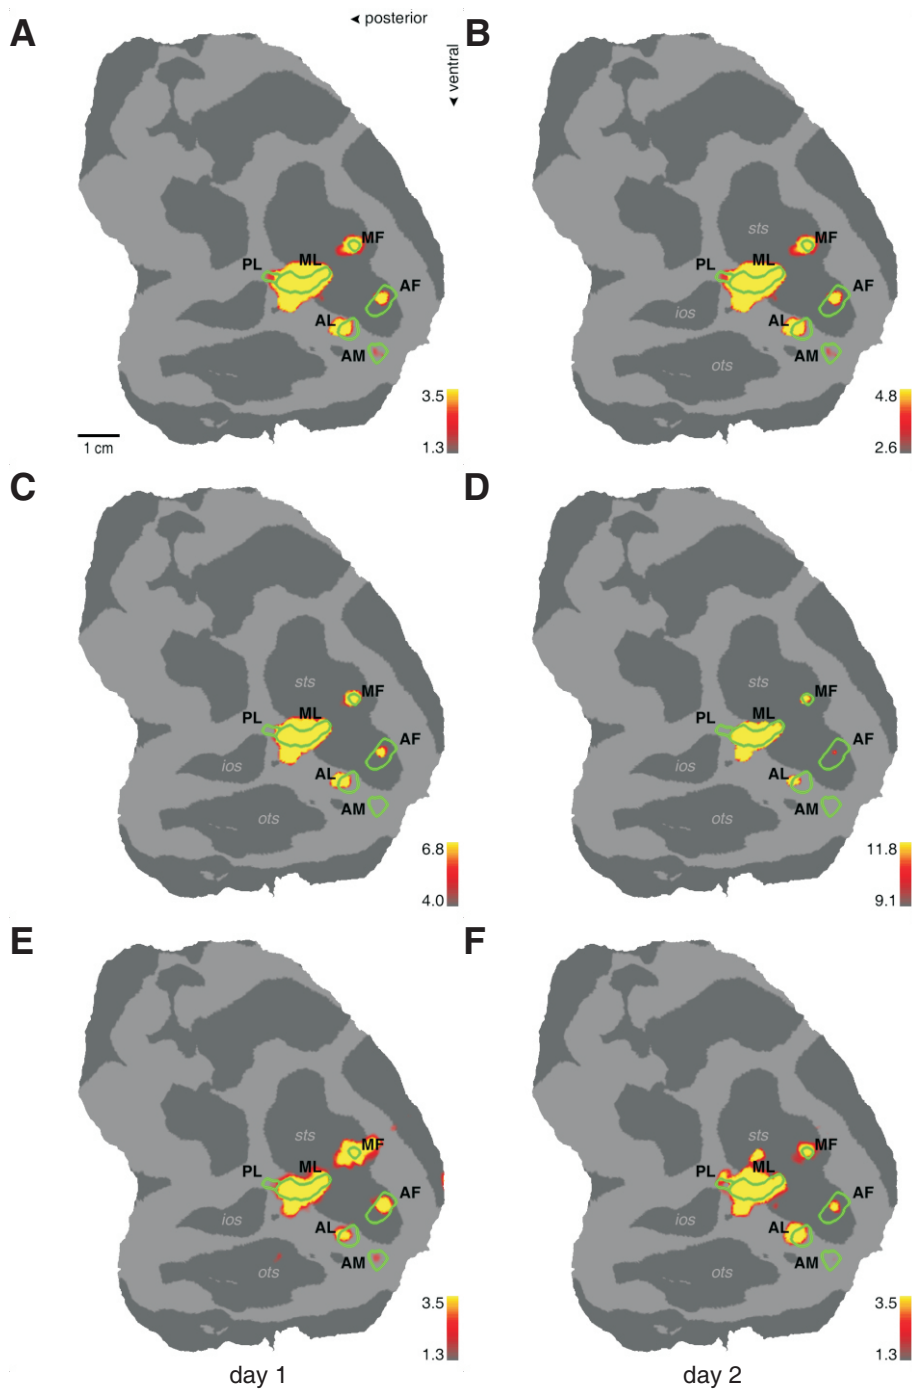

Figure S2: robustness and reproducibility (stimulation inside ML, M1)

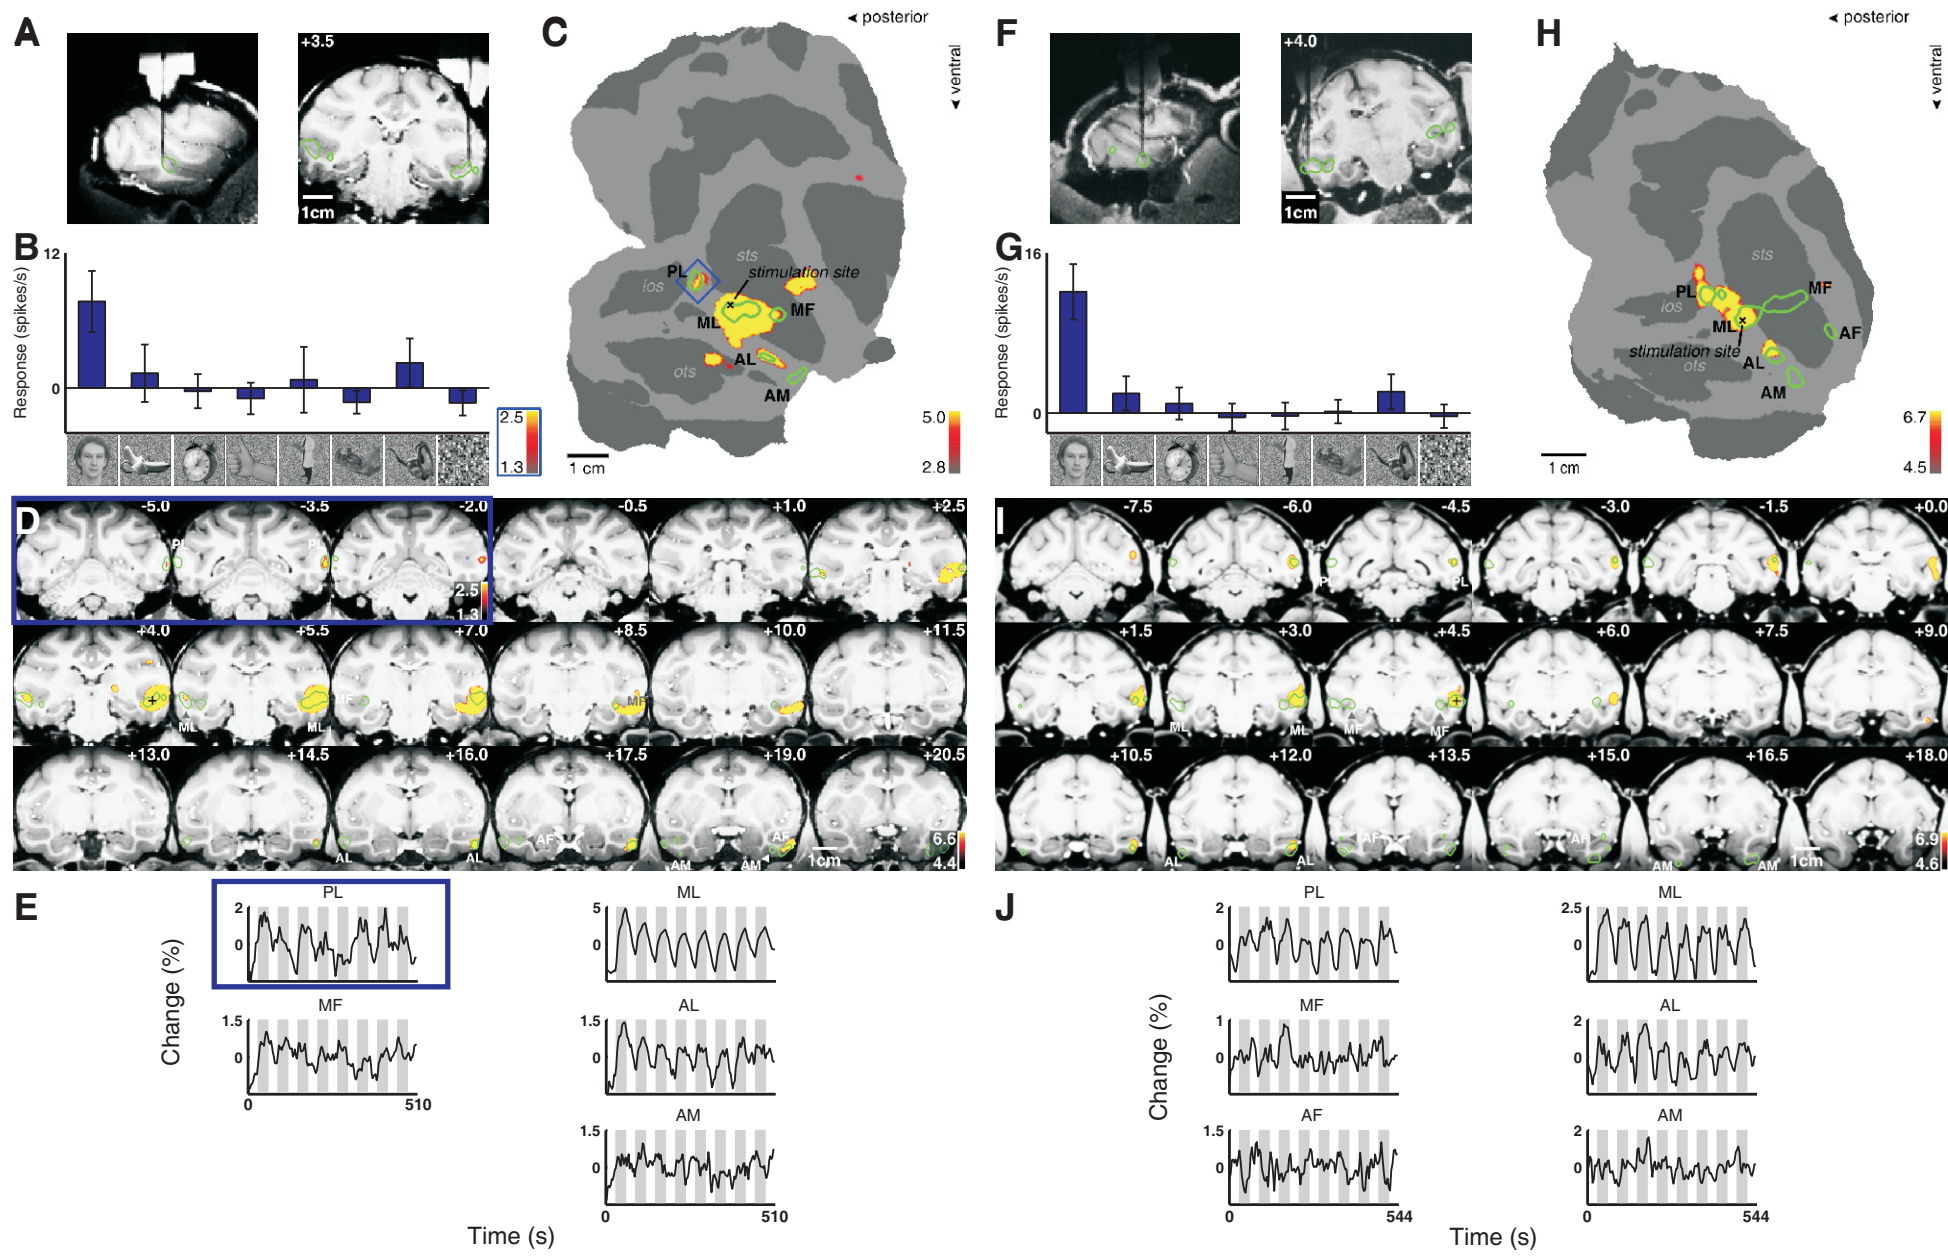

Figure S3: stimulation inside ML (M2, M3)

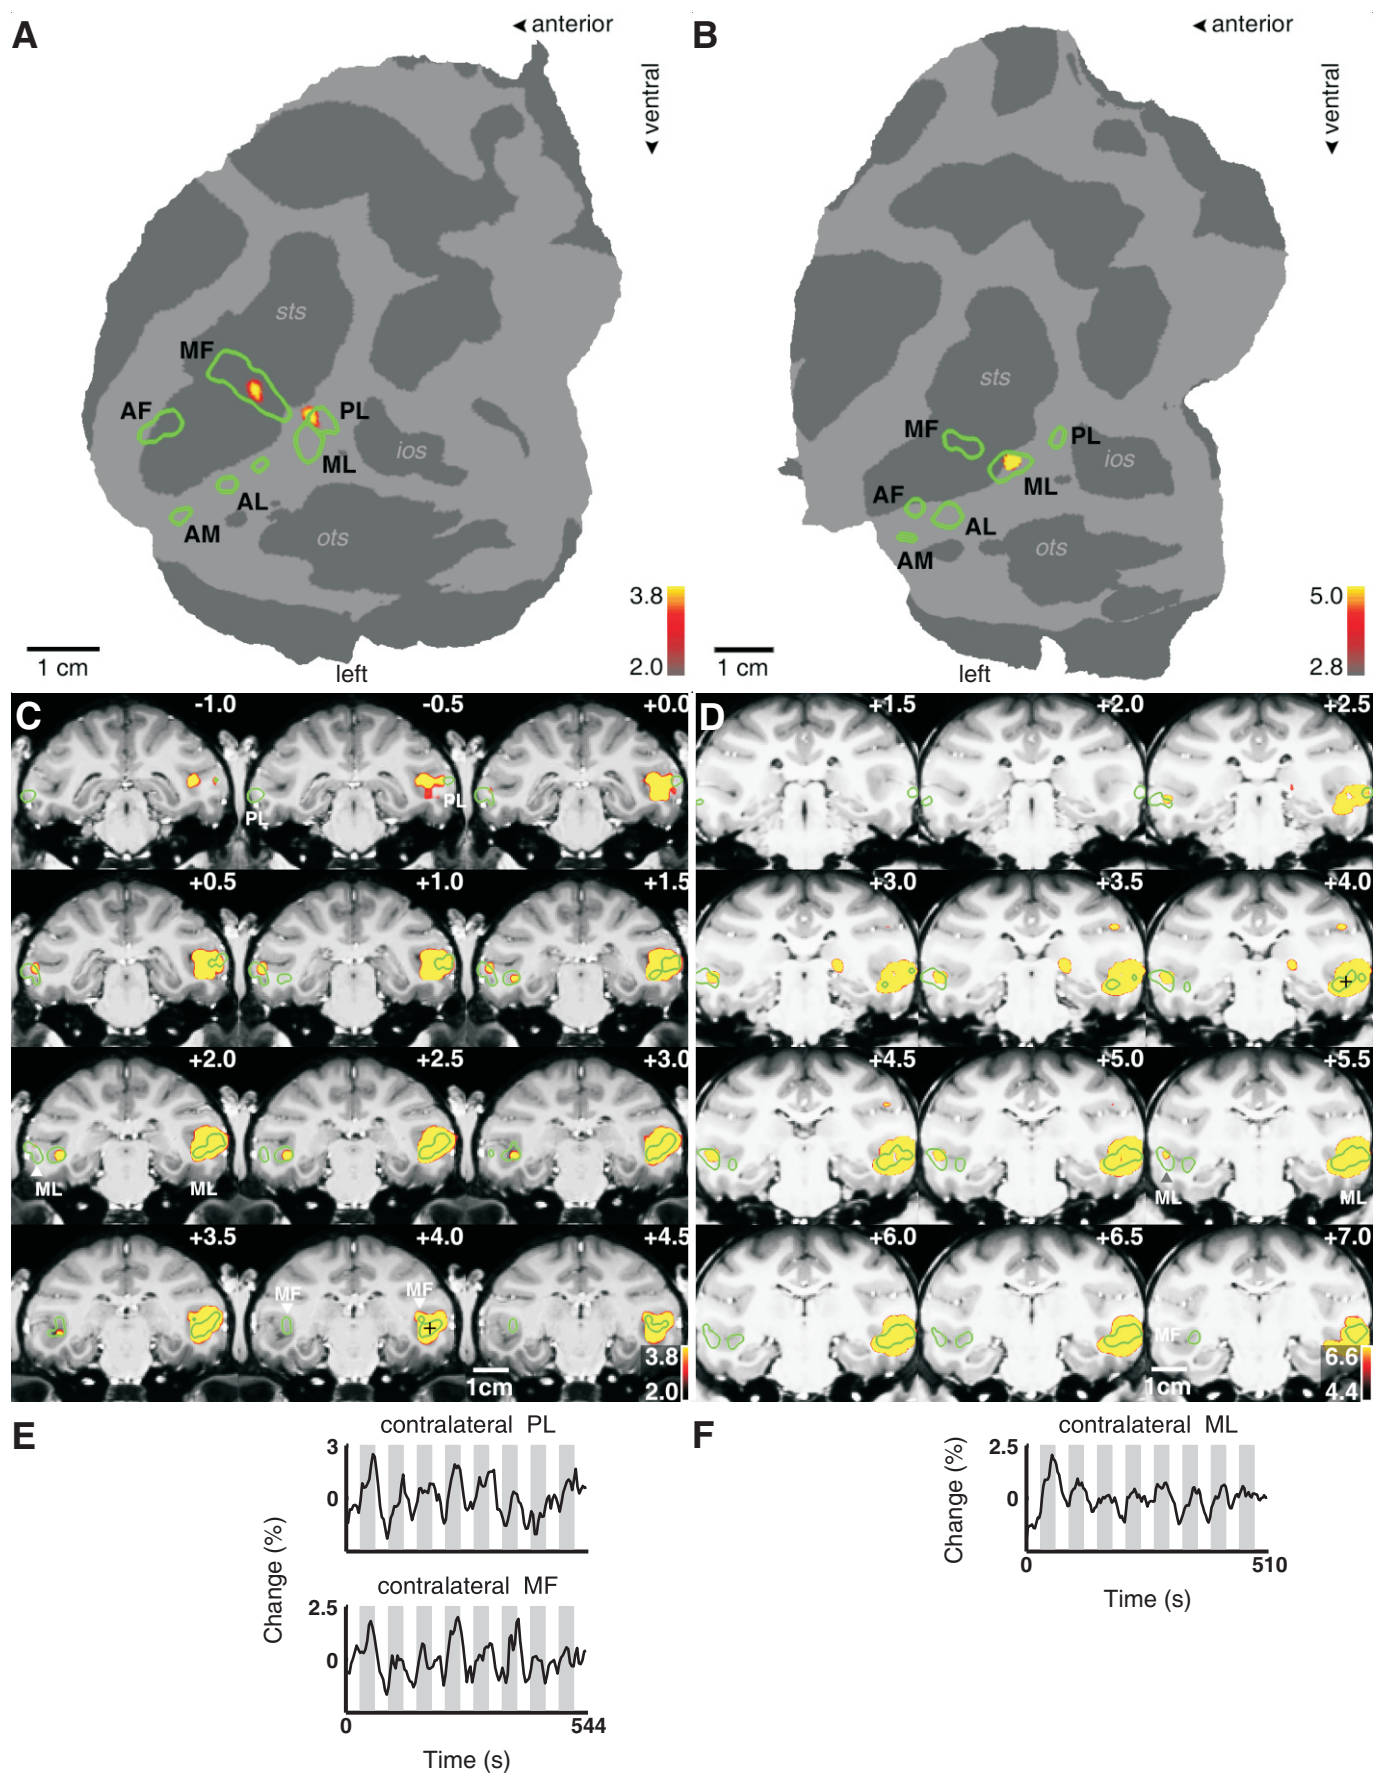

Figure S4: contralateral activation by stimulation inside ML (M1, M2)

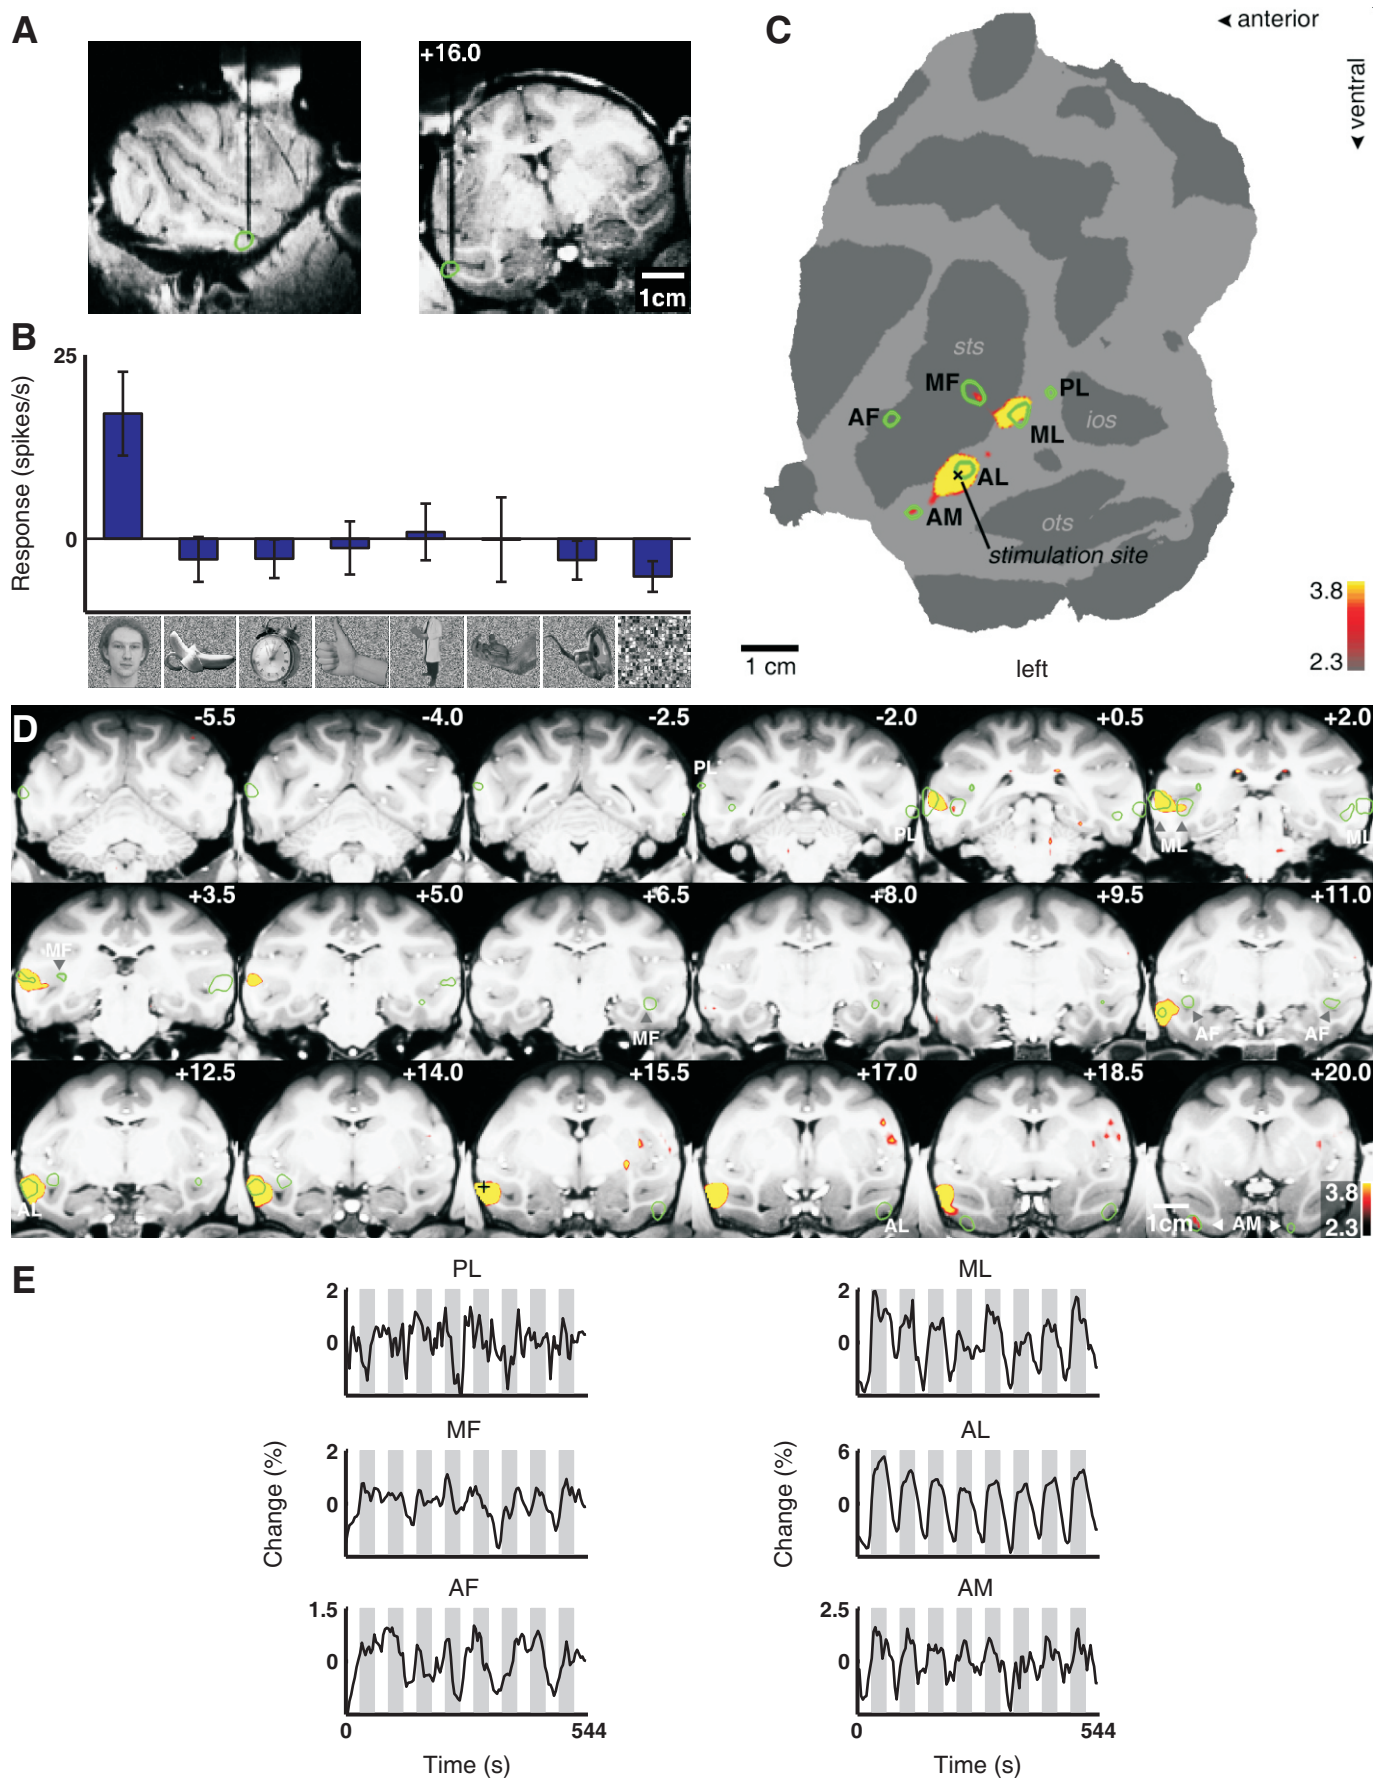

Figure S5: stimulation inside AL (M4)

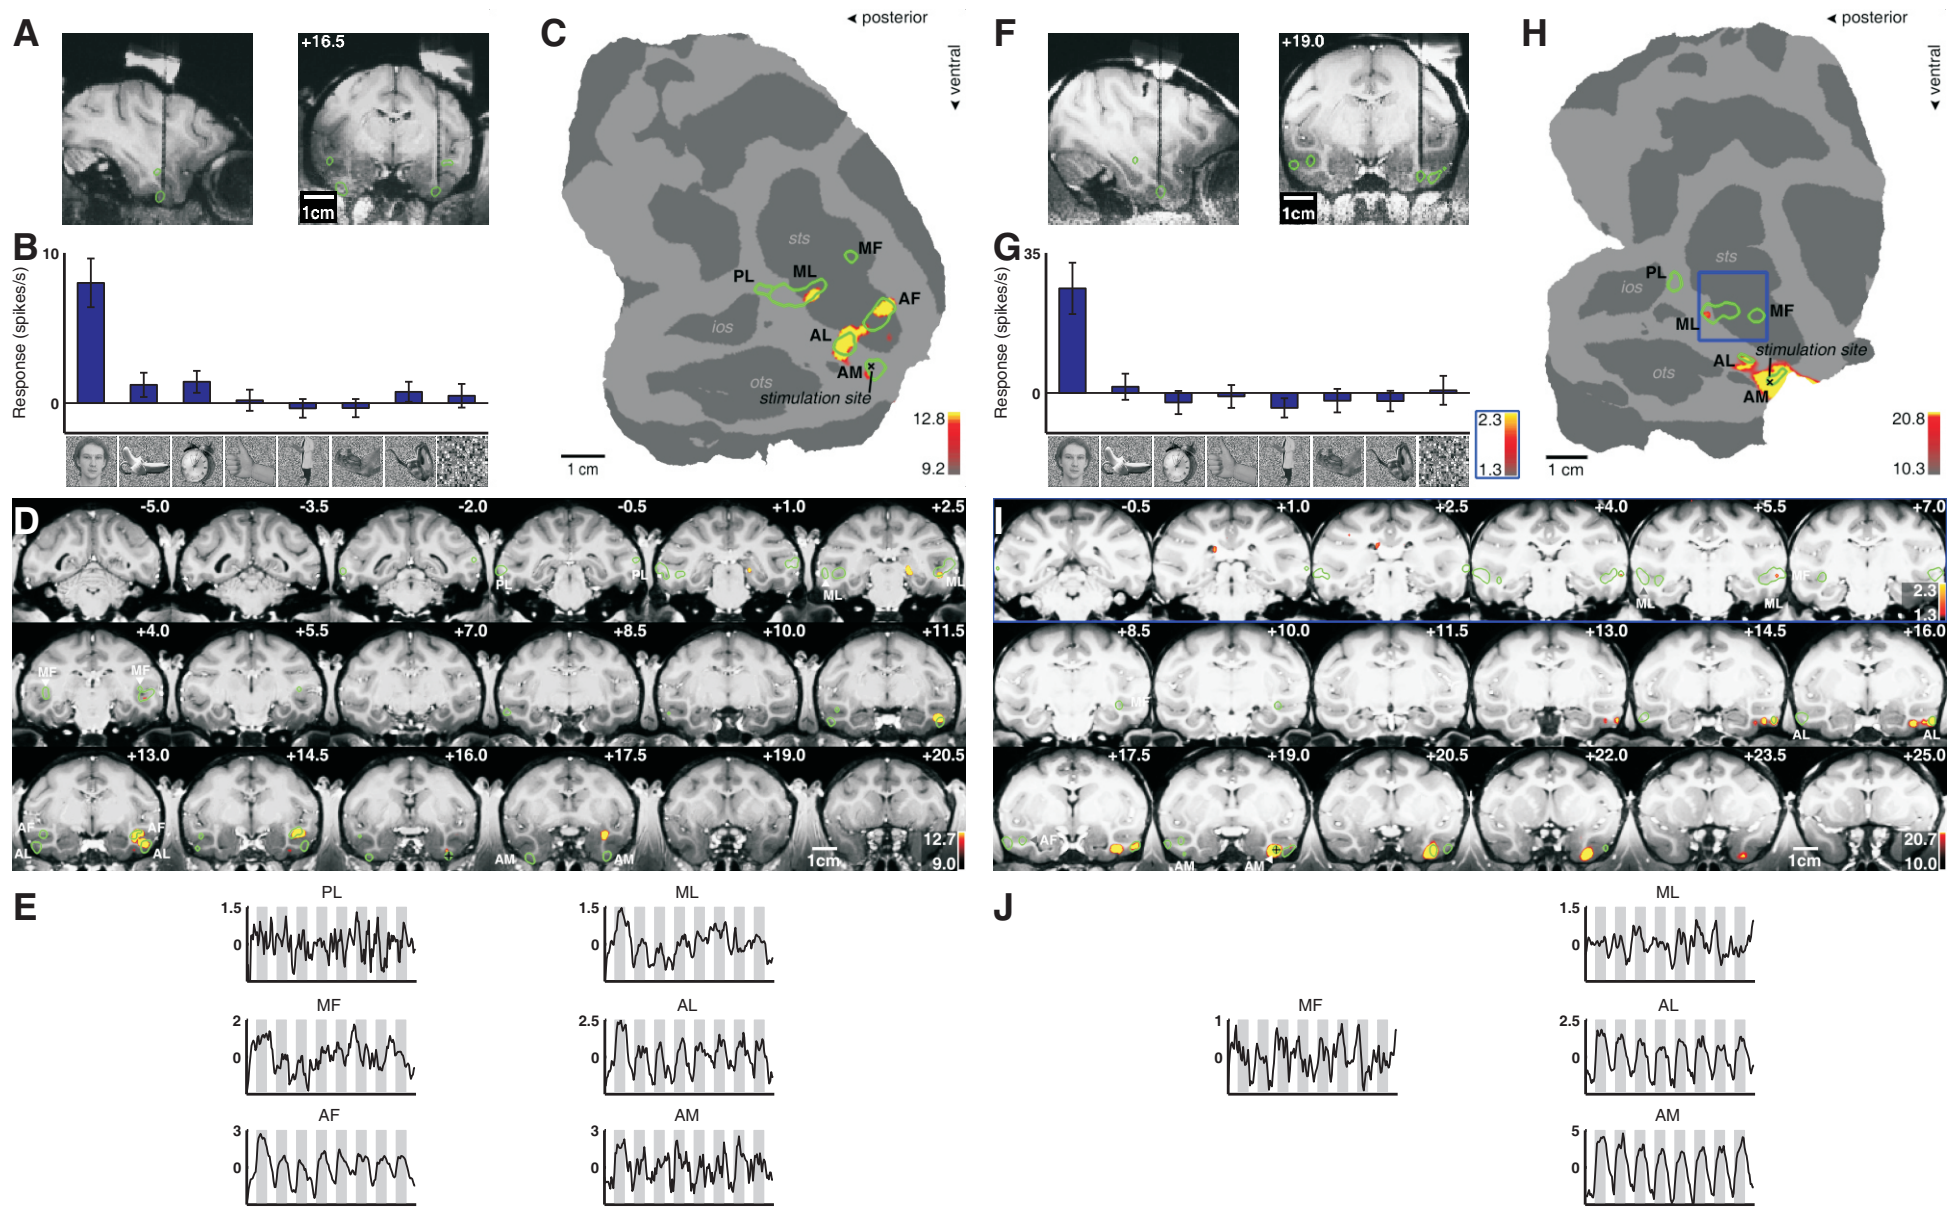

Figure S6: stimulation in AM (M1, M2)

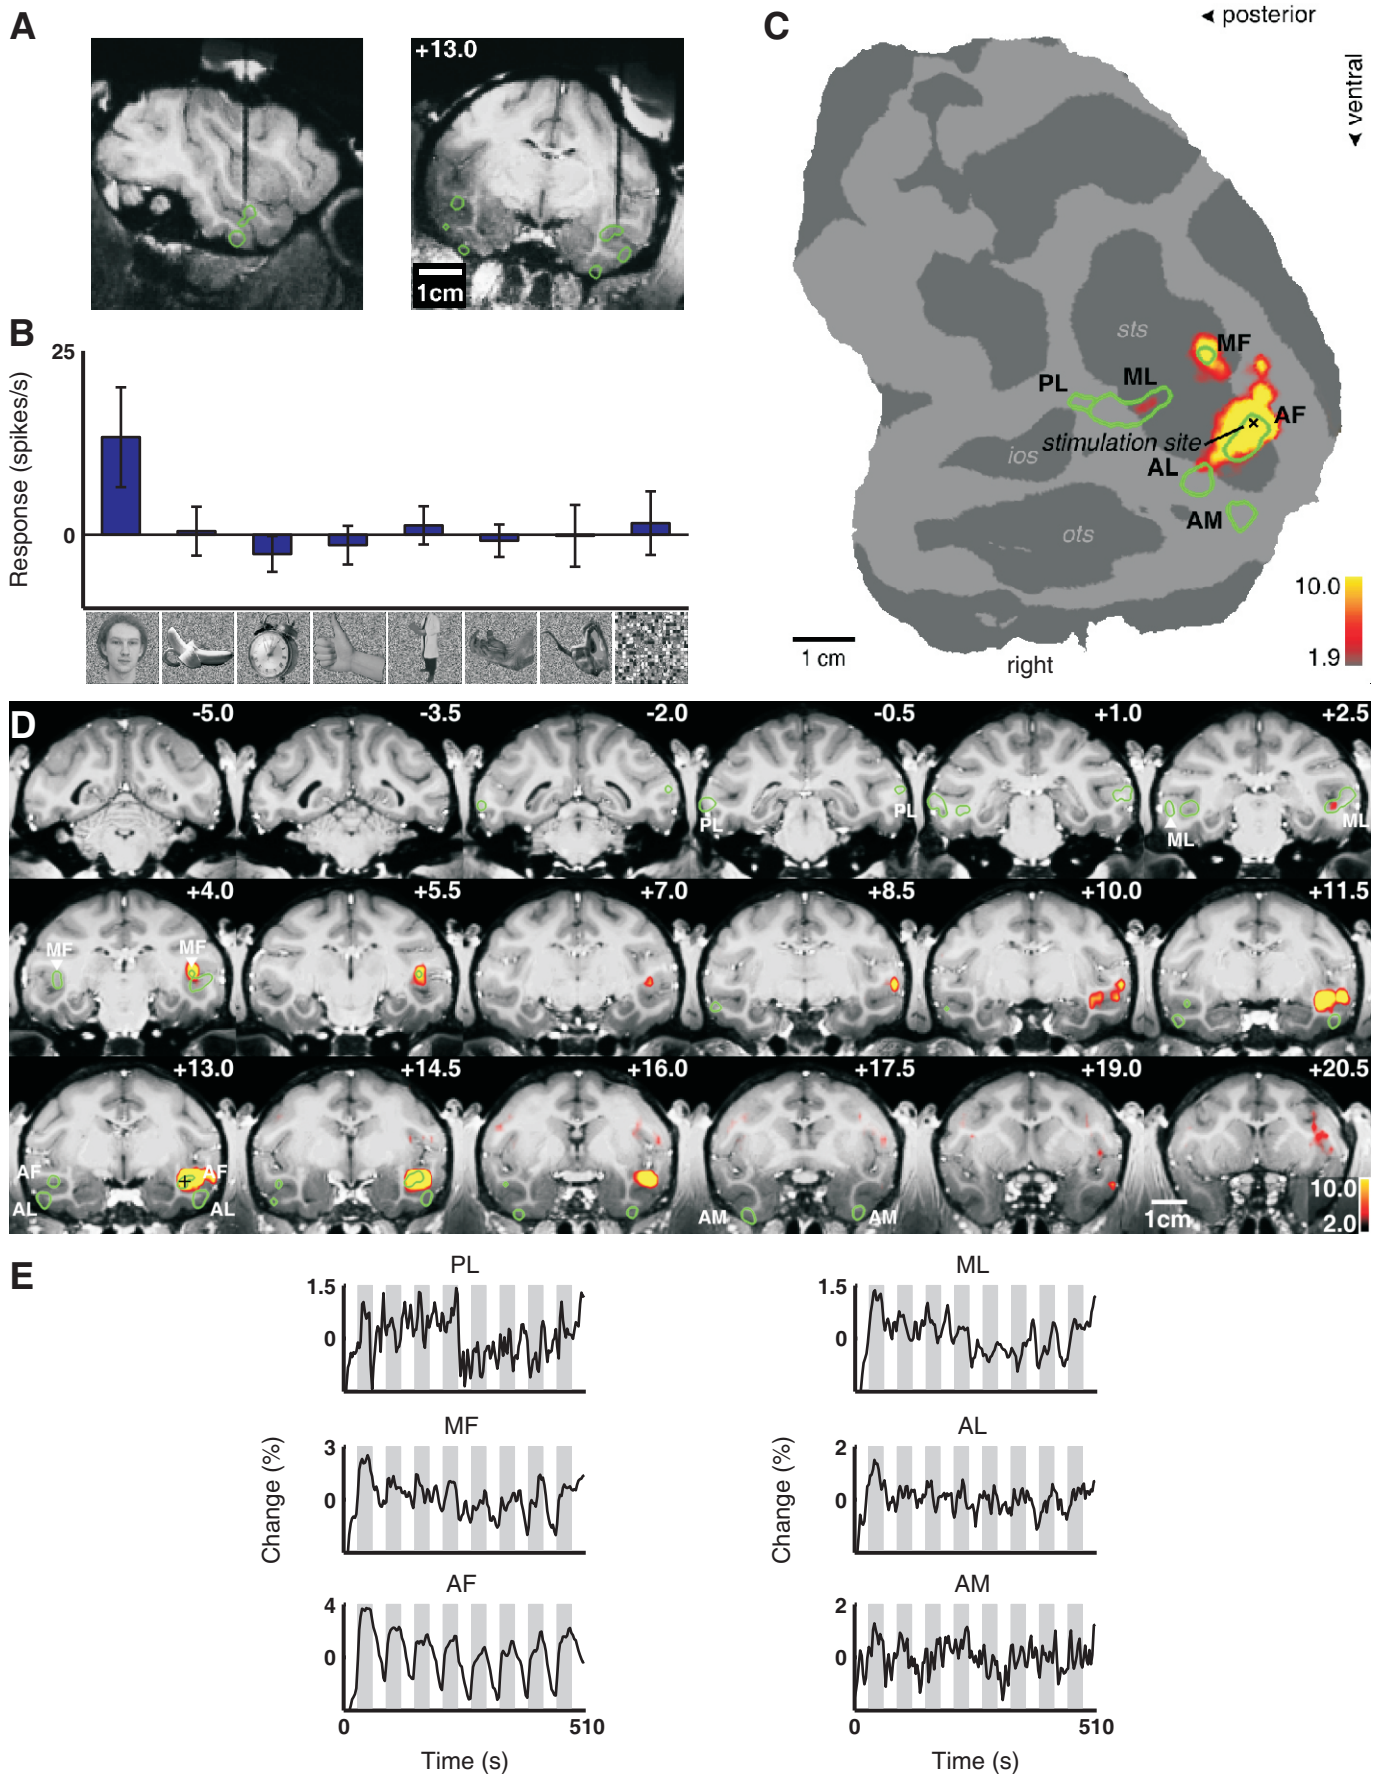

Figure S7: stimulation in AF (M1)

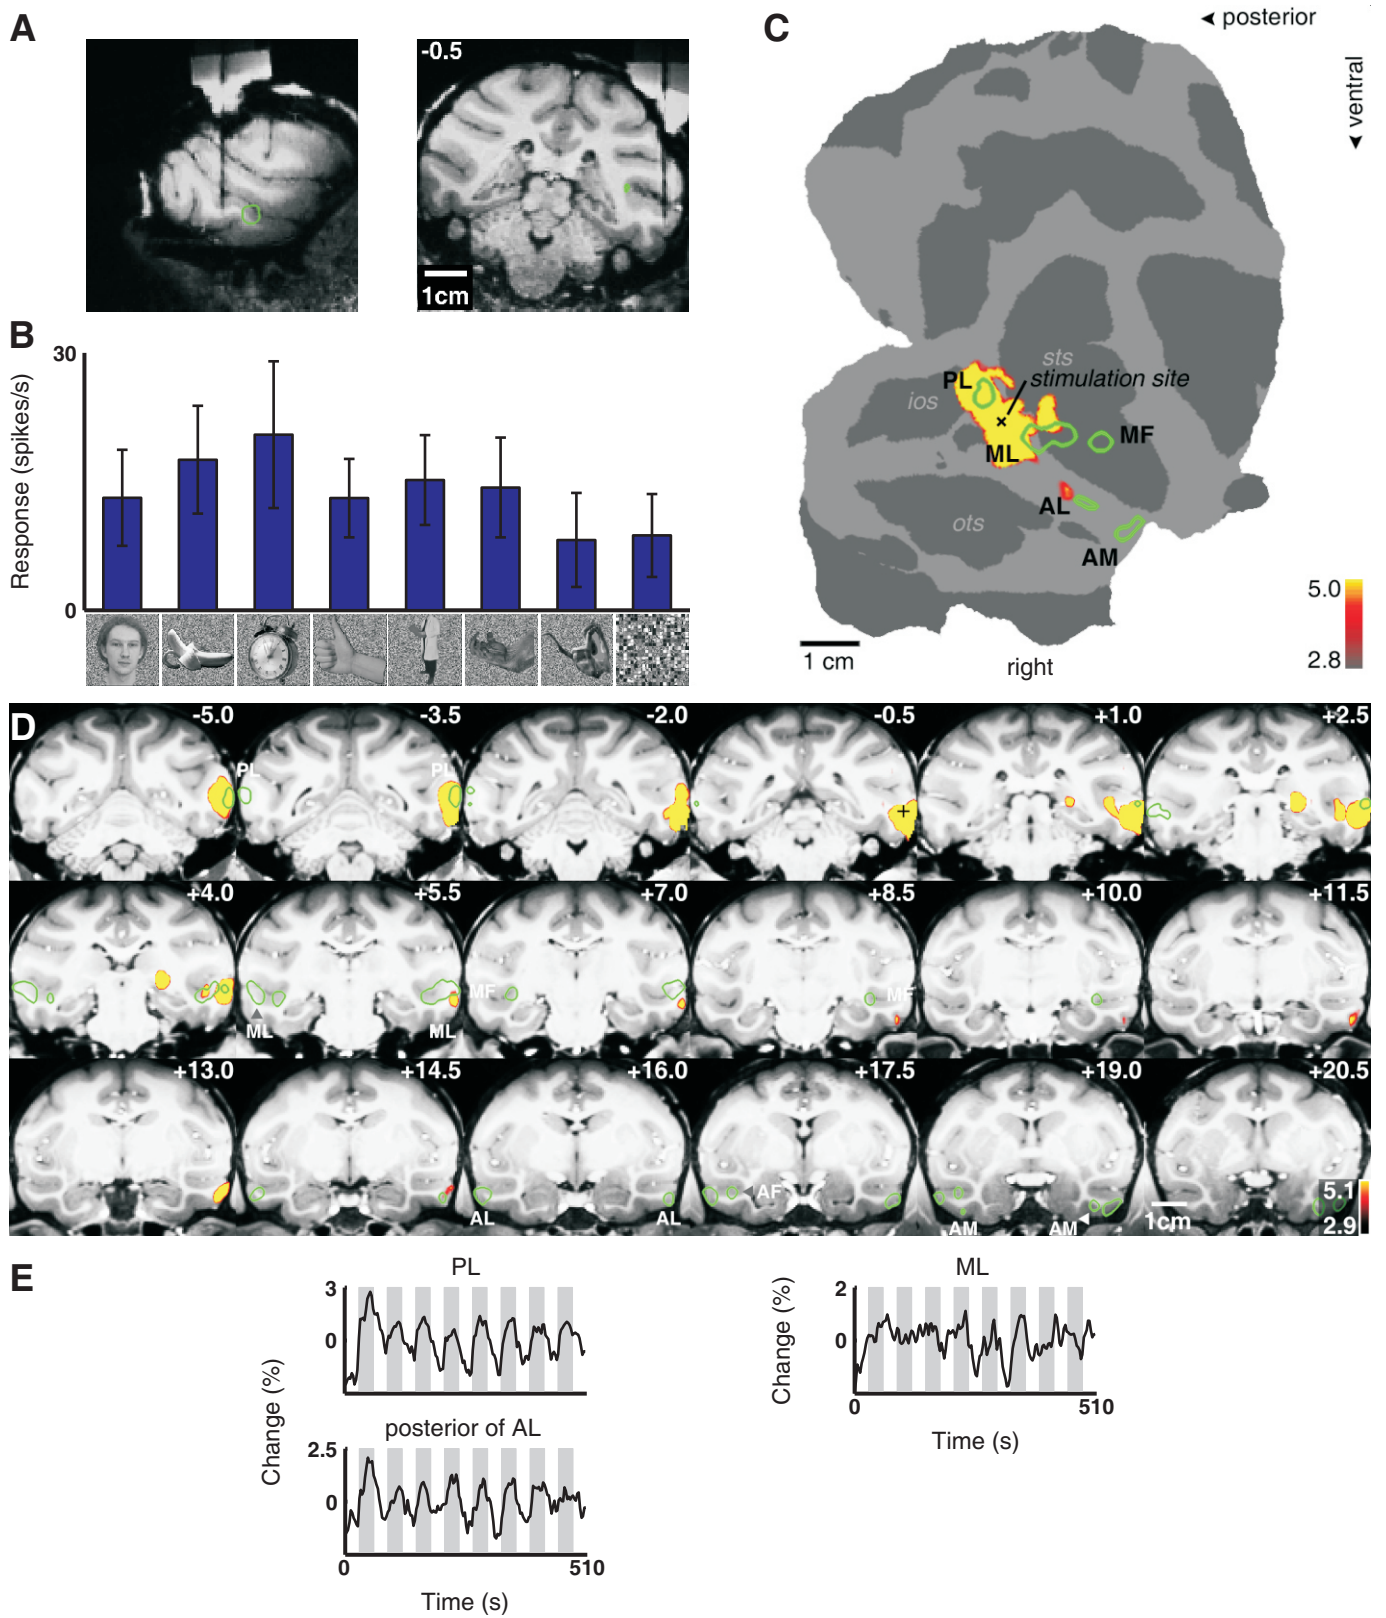

Figure S8: stimulation outside ML (M2)



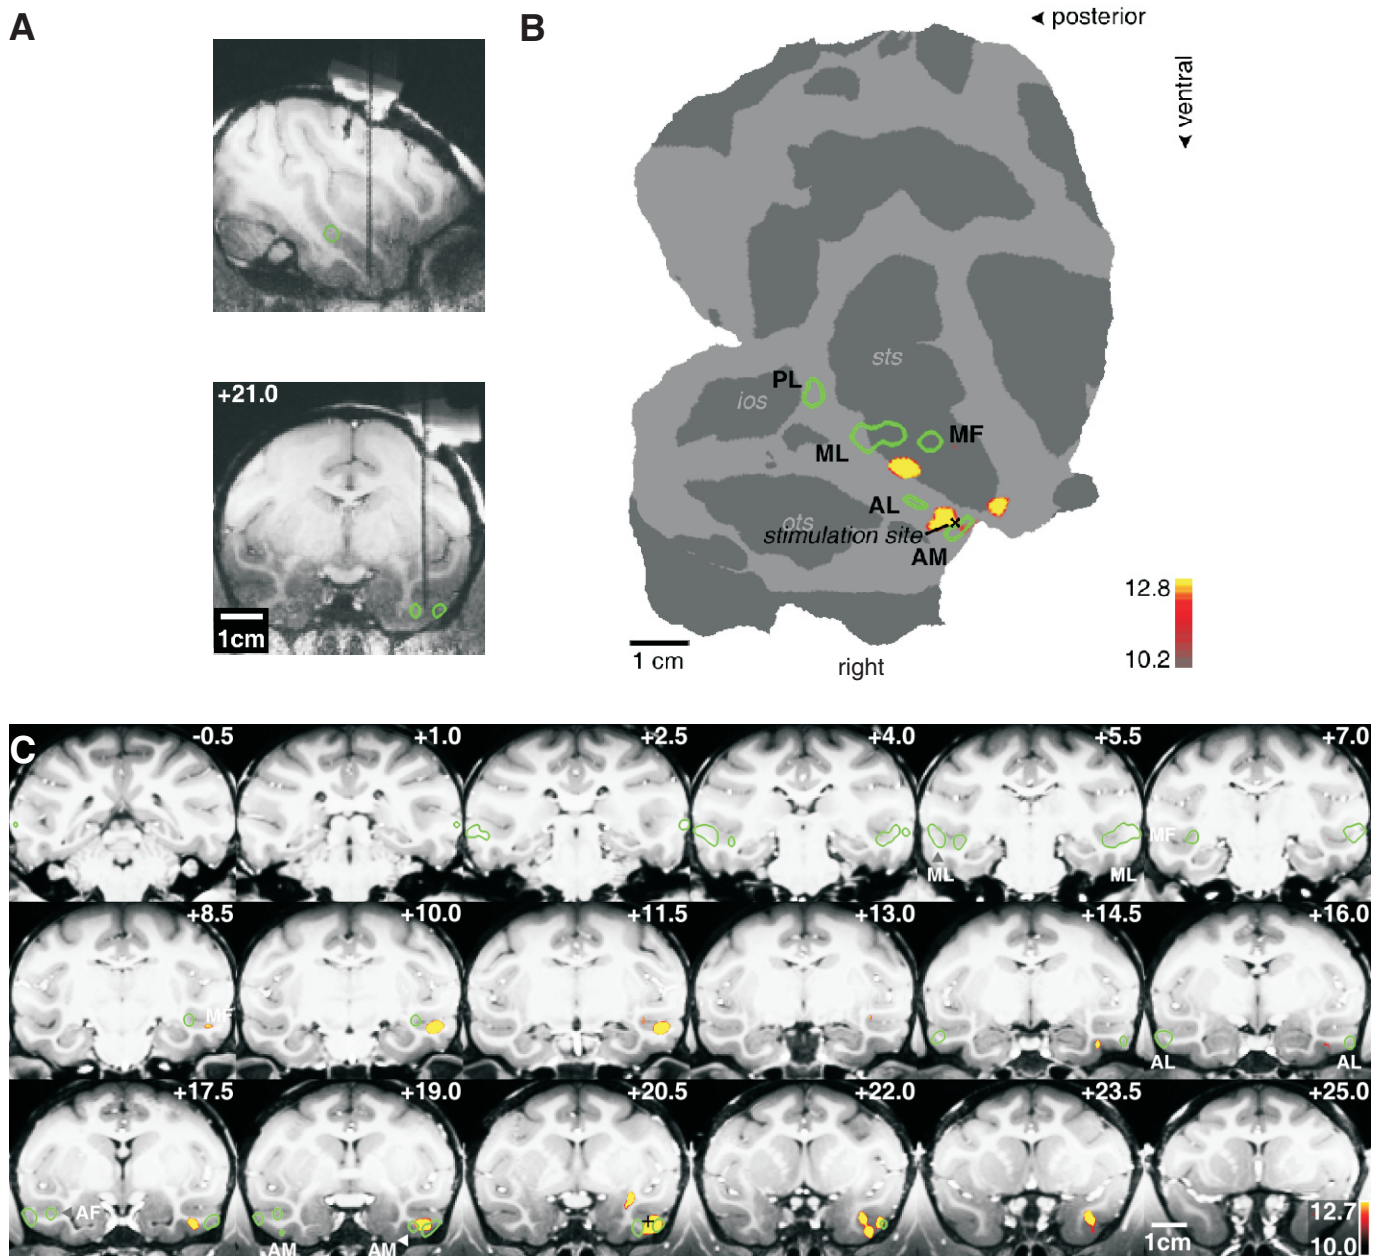

Figure S9: stimulation outside AM (M2)

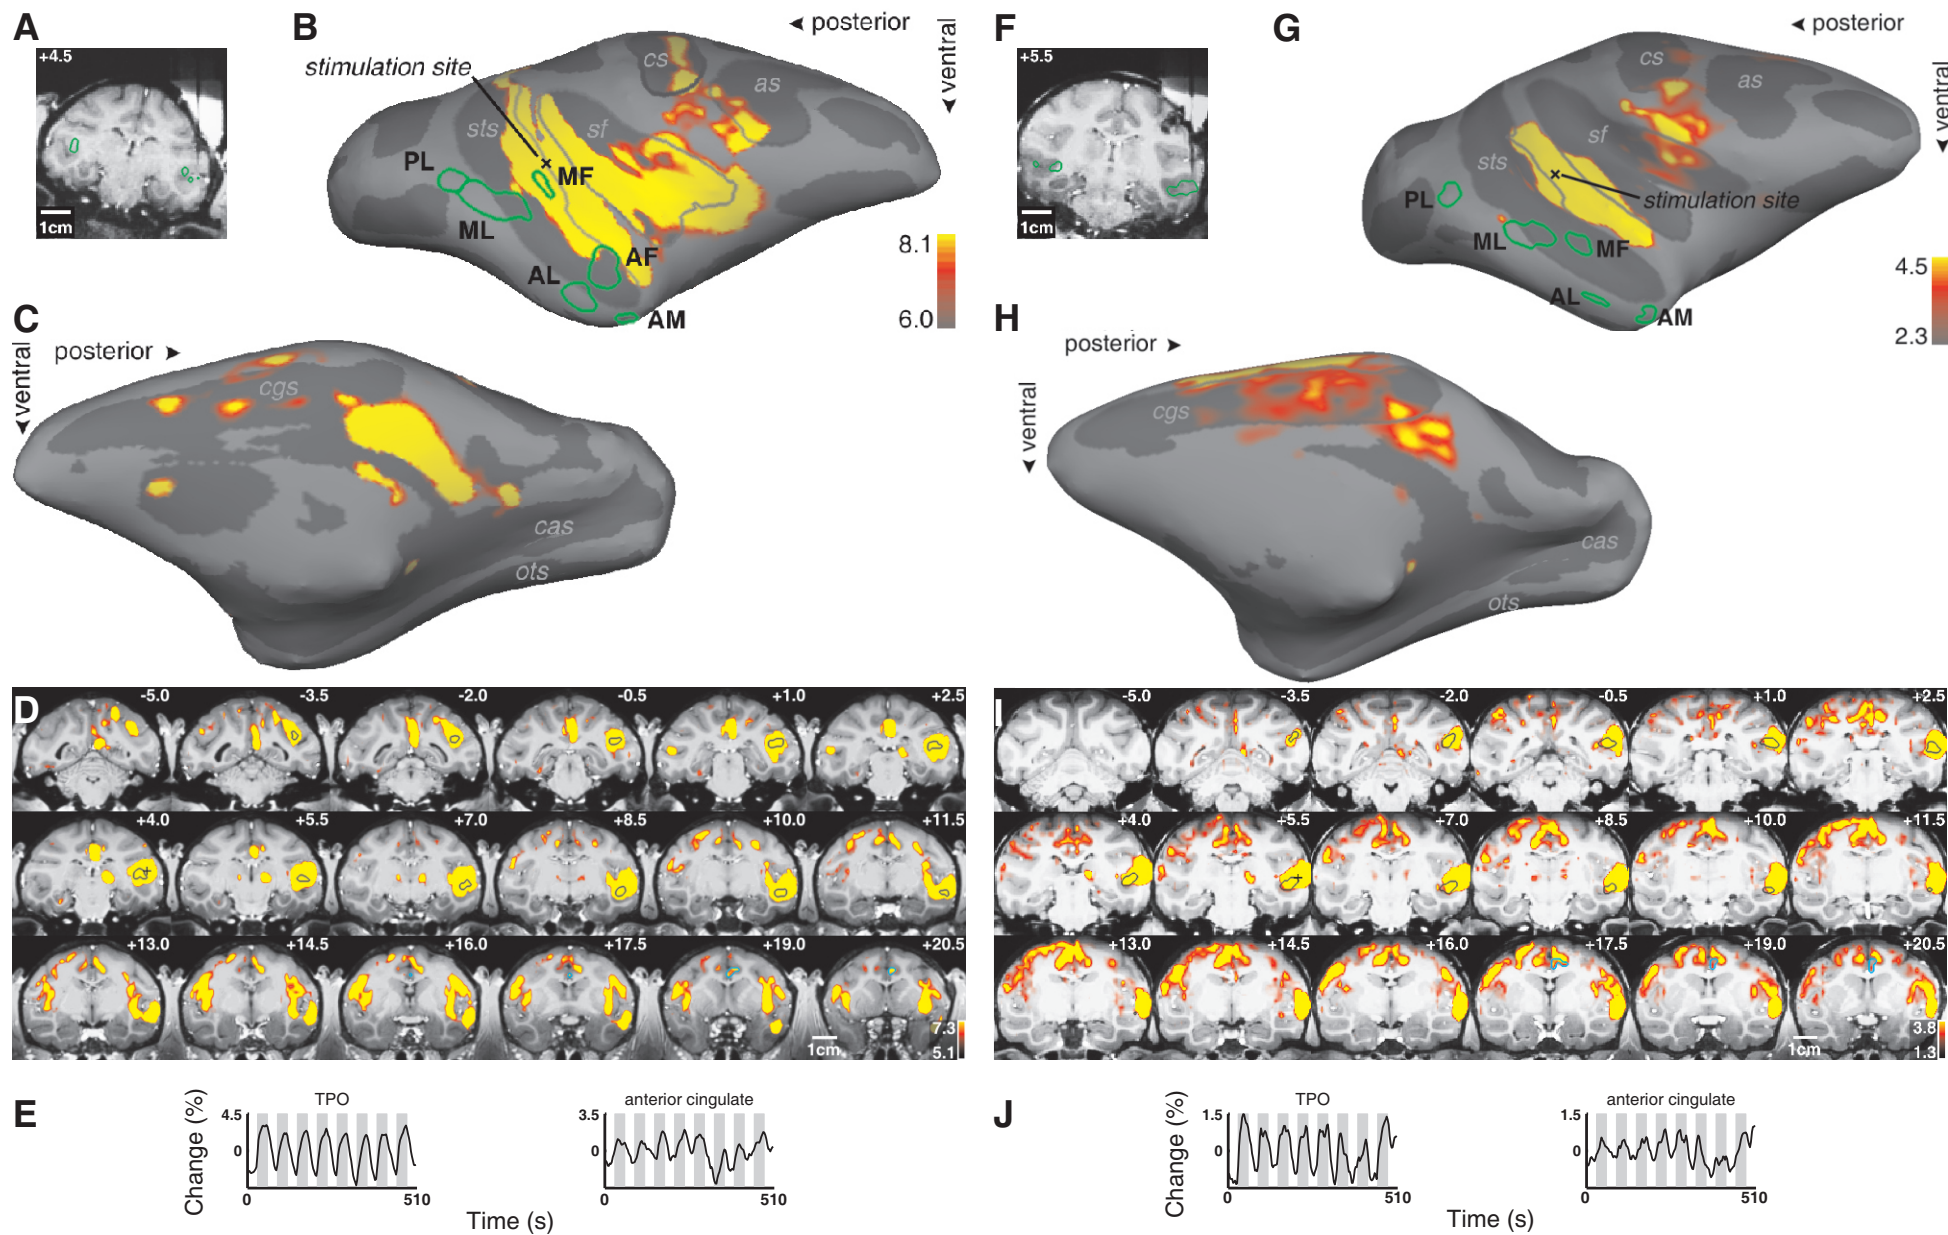

Figure S10: stimulation inside dSTS (M1, M2)

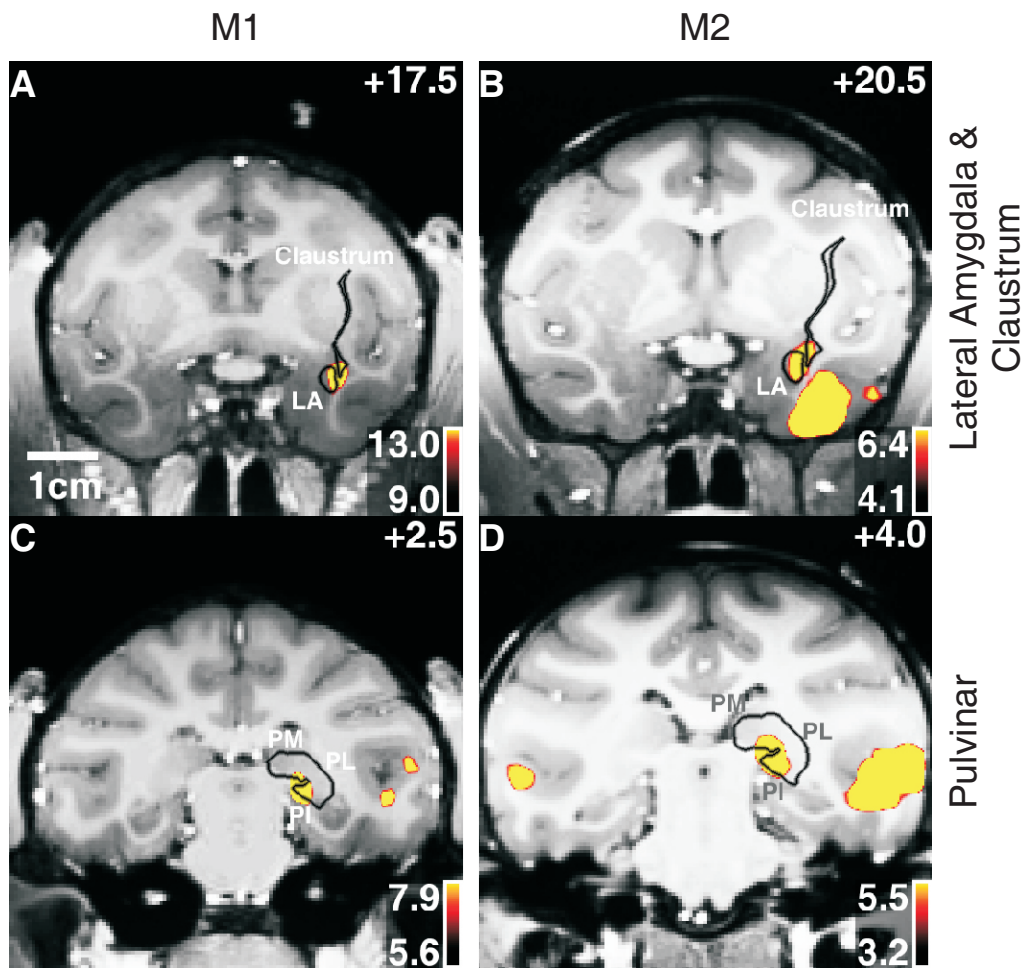

Figure S11: subcortical projections (M1, M2)

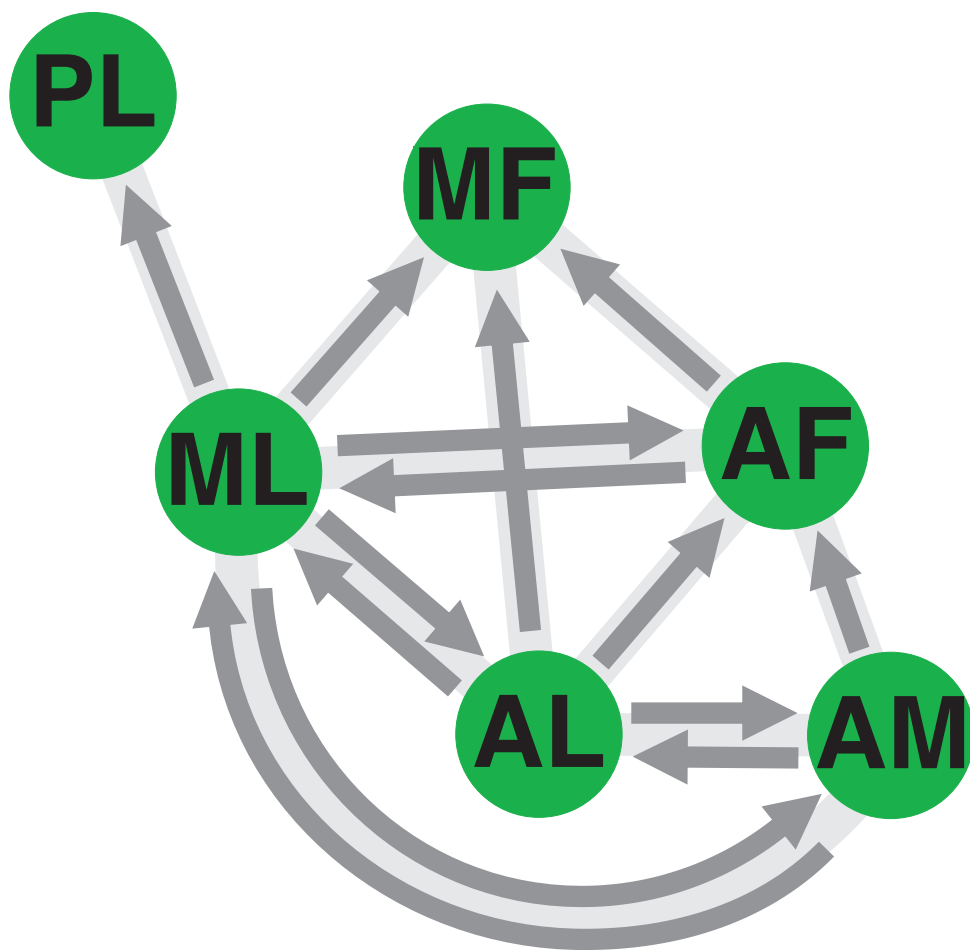

Figure S12: the internal connectivity of the face patch system
